# Supplementary material for: Comprehensive Genomic Characterization of Cutaneous Malignant Melanoma Cell Lines Derived from Metastatic Lesions by Whole-Exome Sequencing and SNP Array Profiling
Source: PubMed Central journal article supplement (PMC3660556; doi:10.1371/journal.pone.0063597), 2013-05-21
Supplement: pone.0063597.s001.pdf [file pone.0063597.s001.pdf]

# Sequencing & Alignment

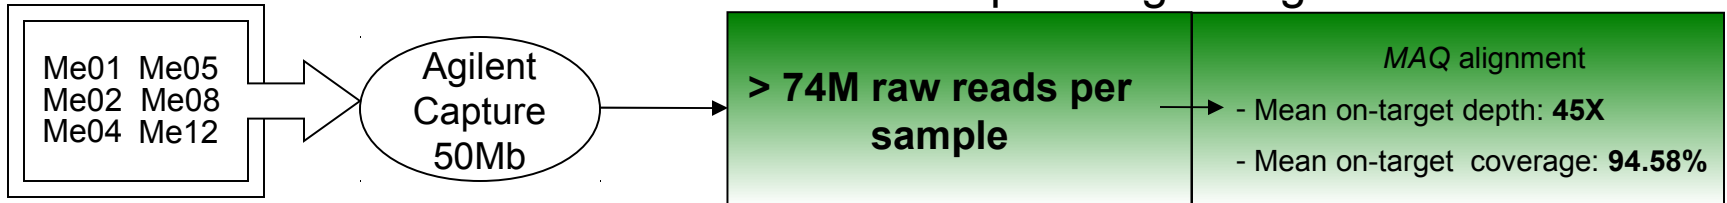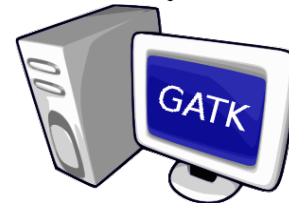

## High-Quality Filtering Criteria

- Depth  $\geq$  15
- QUAL  $\geq$  150
- AF  $\geq$  20%
- Coding Novel SNV
- Clinical rs (dbSNP132)
- Filtered out HLA genes
- Filtered out homologous genes
- Internal exome DB filtering

QUAL= SNV Call PHRED quality;  
AF= Variation Allele Frequency

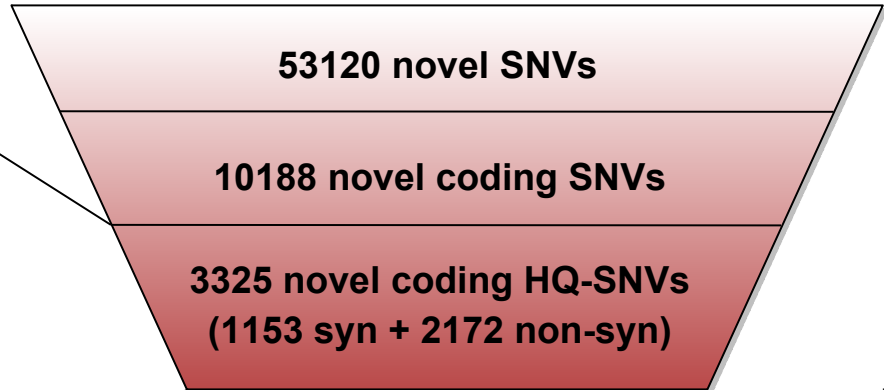

SIFT prediction tool

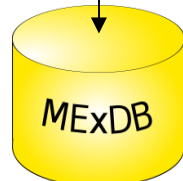

gBrowse

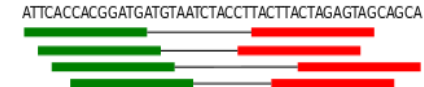

**1770 genes with at least 1 non-syn HQ-SNV**
