# Supplementary material for: Comprehensive Genomic Characterization of Cutaneous Malignant Melanoma Cell Lines Derived from Metastatic Lesions by Whole-Exome Sequencing and SNP Array Profiling
Source: PubMed Central journal article supplement (PMC3660556; doi:10.1371/journal.pone.0063597), 2013-05-21
Supplement: pone.0063597.s004.pdf [file pone.0063597.s004.pdf]

**Supplementary Table S1: Whole-exome sequencing (WES) results.**

Exome capture and sequencing results are reported for each sample throughout all the analytical steps, starting from reads generation and mapping counts to depth and coverage statistics on captured target regions.

|                                                     | Cell line           |                     |                     |                     |                     |                     |
|-----------------------------------------------------|---------------------|---------------------|---------------------|---------------------|---------------------|---------------------|
|                                                     | Me01                | Me02                | Me04                | Me05                | Me08                | Me12                |
| Number of raw reads                                 | 69721034            | 91072538            | 84459524            | 50671560            | 74518054            | 83755682            |
| Number of mapped reads<br>(% of mapped/total reads) | 61114446<br>(87.66) | 80605458<br>(88.51) | 74493737<br>(88.20) | 44052388<br>(86.94) | 65200442<br>(87.50) | 73408916<br>(87.50) |
| Mean read depth on target<br>regions (fold)         | 44.54               | 54.37               | 50.78               | 32.71               | 42.78               | 46.38               |
| Mean coverage on target<br>regions (%)              | 94.96               | 94.25               | 94.45               | 94.66               | 94.70               | 94.44               |
| Coverage at $\geq 15x$ depth (%)                    | 83.32               | 82.47               | 80.01               | 74.05               | 80.01               | 79.69               |
