# Supplementary material for: Comprehensive Genomic Characterization of Cutaneous Malignant Melanoma Cell Lines Derived from Metastatic Lesions by Whole-Exome Sequencing and SNP Array Profiling
Source: PubMed Central journal article supplement (PMC3660556; doi:10.1371/journal.pone.0063597), 2013-05-21
Supplement: pone.0063597.s005.pdf [file pone.0063597.s005.pdf]

**Supplementary Table S2: Characteristics of cutaneous malignant melanoma patients and derived cell lines.**

Melanoma cell lines were derived from surgical specimens of metastatic lesions of six cutaneous malignant melanoma patients, as described in Villablanca et al. (2010). For internal uses, melanoma cell lines were labeled with a progressive number code replacing their original sample names reported in Villablanca et al. (2010). For each case, gender, disease familiarity, stage of melanoma disease and metastasis site from which tumor cell line was derived are reported.

| <i>Internal number code</i> | <i>Original sample name</i> | <i>Gender</i> | <i>Familiarity</i> | <i>Disease stage</i> | <i>Site of origin of tumor cell line</i> |
|-----------------------------|-----------------------------|---------------|--------------------|----------------------|------------------------------------------|
| Me01                        | CIP-5                       | M             | No                 | IV                   | Muscular metastasis                      |
| Me02                        | M3M005                      | F             | No                 | IIIc                 | Subcutaneous metastasis                  |
| Me04                        | M3M001                      | F             | No                 | IV                   | Muscular metastasis                      |
| Me05                        | MR245                       | M             | No                 | IV                   | Lymph node metastasis                    |
| Me08                        | Ost                         | M             | No                 | IV                   | Subcutaneous metastasis                  |
| Me12                        | MR268                       | M             | No                 | IV                   | Lung metastasis                          |
